# Supplementary material
Source: MDPI journal article supplement (https://www.mdpi.com/2071-1050/10/3/578)
Supplement: s1 [file s1]

Figure S1- Wet weight above ground biomass, wet weight of cobs with straw and wet weight of cobs without straw.


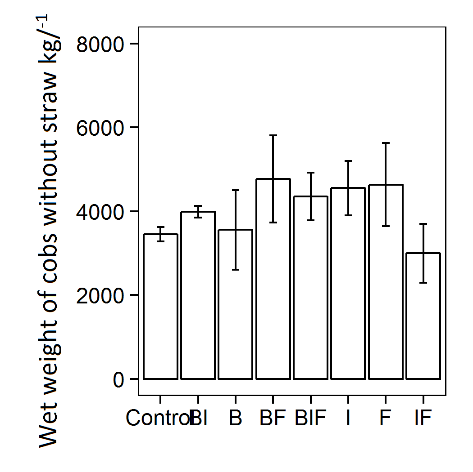
**
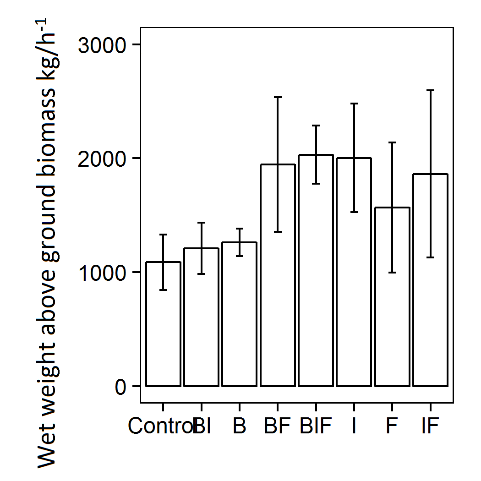
**
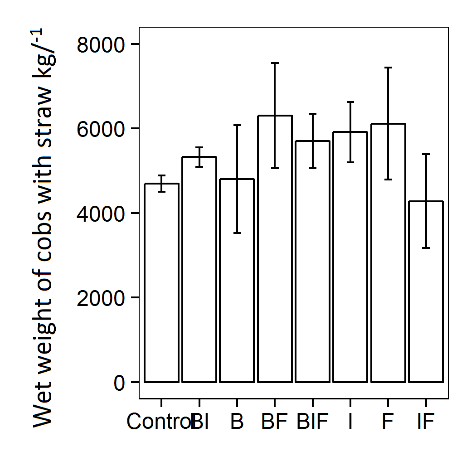


**Table S1.** Summary of results from one-way ANOVA for maize variables. The table gives the individual effects of different treatments on maize biomass characteristics. P-values in bold indicate statistically significant effects (P<0.05). SS, sum of squares; Df, degrees of freedom; MS, mean of squares.

|  |  | **Df** | **SS** | **SM** | **F-value** | **P-value** |
| --- | --- | --- | --- | --- | --- | --- |
| Grains | Treatment | 7 | 29.16 | 4.166 | 3.04 | **0.031** |
| Grains | Residuals | 16 | 21.93 | 1.37 |  |  |
|  |  | **Df** | **SS** | **SM** | **F-value** | **P-value** |
| Dry weight above ground biomass | Treatment | 7 | 450102 | 64300 | 0.942 | 0.503 |
| Dry weight above ground biomass | Residuals | 16 | 1092365 | 68273 |  |  |
|  |  | **Df** | **SS** | **SM** | **F-value** | **P-value** |
| Dry weight of cobs without straw | Treatment | 7 | 3943064 | 563295 | 0.868 | 0.551 |
| Dry weight of cobs without straw | Residuals | 16 | 10383755 | 648985 |  |  |
|  |  | **Df** | **SS** | **SM** | **F-value** | **P-value** |
| Length | Treatment | 7 | 4.099 | 0.5856 | 0.88 | 0.543 |
| Length | Residuals | 16 | 10.644 | 0.6652 |  |  |
|  |  | **Df** | **SS** | **SM** | **F-value** | **P-value** |
| Diameter | Treatment | 7 | 0.1468 | 0.02098 | 0.942 | 0.483 |
| Diameter | Residuals | 16 | 0.3451 | 0.02157 |  |  |
|  |  | **Df** | **SS** | **SM** | **F-value** | **P-value** |
| Wet weight above ground biomass | Treatment | 7 | 3191089 | 455870 | 0744 | 0.64 |
| Wet weight above ground biomass | Residuals | 16 | 9804325 | 612770 |  |  |
|  |  | **Df** | **SS** | **SM** | **F-value** | **P-value** |
| Wet weight of cobs with straw | Treatment | 7 | 11384507 | 1626358 | 0.604 | 0.744 |
| Wet weight of cobs with straw | Residuals | 16 | 43069707 | 2691857 |  |  |
|  |  | **Df** | **SS** | **SM** | **F-value** | **P-value** |
| Wet weight of cobs without straw | Treatment | 7 | 8760326 | 1251475 | 0.785 | 0.61 |
| Wet weight of cobs without straw | Residuals | 16 | 25512244 | 1594515 |  |  |

**Table S2.** Summary of results from post-hoc HSD-Tukey test, considering only the statistically significant effects of the treatments (*P*<0.05) on the mass of 100 grains of maize. The different letters in the Group column represents significant differences between the treatments. Treatments are represented by: B (Biochar), BIF (Biochar + Inoculant + Fertilizer), BI (Biochar + Inoculant), BF (Biochar + Fertilizer), I (Inoculant), IF (Inoculant + Fertilizer), F (Fertilizer), and Control.

| **Grains** | **Means** | **Group** |
| --- | --- | --- |
| F | 23.77 | a |
| I | 22.87 | ab |
| BF | 22.12 | ab |
| BI | 21.50 | ab |
| BIF | 21.47 | ab |
| B | 20.93 | ab |
| IF | 20.73 | ab |
| Control | 20.20 | b |

Figure S2- Wet weight above ground biomass and wet weight of pod production. Symbol * indicates statistically significant difference between treatment C and I.

**
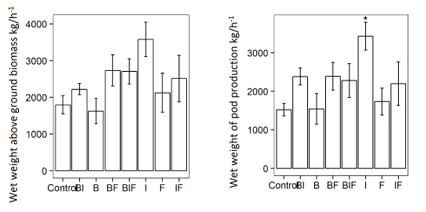
**

**Table S3.** Summary of results from one-way ANOVA. The table gives the individual effects of different treatments on bean biomass characteristics. P-values in bold indicate statistically significant effects (P<0.05). SS, sum of squares; Df, degrees of freedom; MS, mean of squares.

|  |  | **Df** | **SS** | **SM** | **F-value** | **P-value** |
| --- | --- | --- | --- | --- | --- | --- |
| Number of nodules | Treatment | 7 | 18433 | 2633.3 | 4.698 | **0.0049** |
| Number of nodules | Residuals | 16 | 8968 | 560.5 |  |  |
|  |  | **Df** | **SS** | **SM** | **F-value** | **P-value** |
| Dry weight above ground biomass | Treatment | 7 | 222990 | 31856 | 2.699 | **0.0474** |
| Dry weight above ground biomass | Residuals | 16 | 188878 | 11805 |  |  |
|  |  | **Df** | **SS** | **SM** | **F-value** | **P-value** |
| Dry weight of pod production | Treatment | 7 | 100530 | 14361 | 3608 | **0.0159** |
| Dry weight of pod production | Residuals | 16 | 63687 | 3980 |  |  |
|  |  | **Df** | **SS** | **SM** | **F-value** | **P-value** |
| Wet weight above ground biomass | Treatment | 7 | 8037288 | 1148184 | 2.184 | **0.0928** |
| Wet weight above ground biomass | Residuals | 16 | 8411377 | 525711 |  |  |
|  |  | **Df** | **SS** | **SM** | **F-value** | **P-value** |
| Wet weight of pod production | Treatment | 7 | 8098875 | 1156982 | 2.743 | **0.0448** |
| Wet weight of pod production | Residuals | 16 | 6747553 | 421722 |  |  |

**Table S4.** Summary of results from post-hoc HSD-Tukey test, considering only the statistically significant effects of the treatments (*P*<0.05) on bean biomass. The different letters in the Group column represents significant differences between the treatments. Treatments are represented by: B (Biochar), BIF (Biochar + Inoculant + Fertilizer), BI (Biochar + Inoculant), BF (Biochar + Fertilizer), I (Inoculant), IF (Inoculant + Fertilizer), F (Fertilizer), and Control.

| **Dry weight above ground biomass** | **Means** | **Group** |
| --- | --- | --- |
| I | 610.76 | a |
| BF | 466.35 | ab |
| BIF | 461.57 | ab |
| IF | 442.83 | ab |
| BI | 385.25 | ab |
| F | 359.95 | ab |
| Control | 325.6 | ab |
| B | 278.86 | b |
| **Dry weight of pod production** | **Means** | **Group** |
| I | 437.95 | a |
| BI | 358.93 | ab |
| BIF | 334.7 | ab |
| BF | 332.75 | ab |
| IF | 313.83 | ab |
| B | 254.15 | b |
| Control | 244.35 | b |
| F | 230.83 | b |
| **Wet weight of pod production** | **Means** | **Group** |
| I | 3432.46 | a |
| BF | 2388.36 | ab |
| BI | 2382.83 | ab |
| BIF | 2280.5 | ab |
| IF | 2198.98 | ab |
| F | 1735.05 | ab |
| B | 1542.60 | b |
| Control | 1522.80 | b |
| **Number of nodules** | **Means** | **Group** |
| BIF | 73.8 | a |
| BI | 68.73 | ab |
| I | 51 | abc |
| IF | 37 | abc |
| Control | 17.26 | abc |
| BF | 7.06 | abc |
| B | 3.2 | bc |
| F | 0.46 | c |

**Table S5.** Summary of results from RM-Anova. The table gives the individual and interactive effects of different treatments and different time points on soil chemical properties for **maize and bean crops**. P values in bold indicate statistically significant effects (P<0.05). SS, sum of squares; Df, degrees of freedom; MS, mean of squares. Where: N (Nitrogen), P (Phosphorus), K (Potassium), Mg (Magnesium), pH (soil acidity), C/N (Carbon/ nitrogen ratio), CEC Effective (Effective Cation exchange capacity), CEC Potential (Potential Cation exchange capacity), Curve 0.1 and Curve 15 (Retention Soil Moisture curve).

|  |  | **Df** | **SS** | **MS** | **F-value** | **P-value** |
| --- | --- | --- | --- | --- | --- | --- |
| **pH** | Treatment | 7 | 6.231 | 0.8902 | 7.035 | **0.0000** |
| **pH** | Time | 2 | 1.295 | 0.6476 | 5.119 | **0.0097** |
| **pH** | Treatment x Time | 14 | 1.838 | 0.1313 | 1.038 | 0.4347 |
|  |  | **Df** | **SS** | **MS** | **F-value** | **P-value** |
| **N** | Treatment | 7 | 0.3 | 0.04286 | 1.286 | 0.2775 |
| **N** | Time | 2 | 0.6175 | 0.30875 | 9.263 | **0.0004** |
| **N** | Treatment x Time | 14 | 0.4825 | 0.03446 | 1.034 | 0.4380 |
|  |  | **Df** | **SS** | **MS** | **F-value** | **P-value** |
| **P** | Treatment | 7 | 1963 | 280.5 | 1.437 | 0.2130 |
| **P** | Time | 2 | 1173 | 586.6 | 3.005 | **0.0590** |
| **P** | Treatment x Time | 14 | 734 | 52.4 | 0.269 | 0.9950 |
|  |  | **Df** | **SS** | **MS** | **F-value** | **P-value** |
| **K** | Treatment | 7 | 25707 | 3672 | 12.863 | **0.0000** |
| **K** | Time | 2 | 712 | 356 | 1.248 | 0.2960 |
| **K** | Treatment x Time | 14 | 1754 | 125 | 0.439 | 0.9530 |
|  |  | **Df** | **SS** | **MS** | **F-value** | **P-value** |
| **Mg** | Treatment | 7 | 0.3061 | 0.04373 | 4.089 | **0.0014** |
| **Mg** | Time | 2 | 0.0844 | 0.04222 | 3.948 | **0.0259** |
| **Mg** | Treatment x Time | 14 | 0.0756 | 0.0054 | 0.505 | 0.9189 |
|  |  | **Df** | **SS** | **MS** | **F-value** | **P-value** |
| **C/N** | Treatment | 7 | 6.28 | 0.9 | 1.234 | 0.3034 |
| **C/N** | Time | 2 | 83.99 | 42 | 57.749 | **0.0000** |
| **C/N** | Treatment x Time | 14 | 17.07 | 1.22 | 1.676 | 0.0929 |
|  |  | **Df** | **SS** | **MS** | **F-value** | **P-value** |
| **Organic matter** | Treatment | 7 | 0.1024 | 0.0146 | 0.936 | 0.4880 |
| **Organic matter** | Time | 2 | 2.5313 | 1.2656 | 80.986 | **0.0000** |
| **Organic matter** | Treatment x Time | 14 | 0.3203 | 0.0229 | 1.464 | 0.1620 |
|  |  | **Df** | **SS** | **MS** | **F-value** | **P-value** |
| **Moisture** | Treatment | 7 | 23.5 | 3.36 | 2.107 | 0.0606 |
| **Moisture** | Time | 2 | 431.1 | 215.55 | 135.292 | **0.0000** |
| **Moisture** | Treatment x Time | 14 | 31.4 | 2.24 | 1.407 | 0.1868 |
|  |  | **Df** | **SS** | **MS** | **F-value** | **P-value** |
| **CEC Effective** | Treatment | 7 | 3.46 | 0.4942 | 2.863 | **0.0140** |
| **CEC Effective** | Time | 2 | 0.273 | 0.1363 | 0.789 | 0.4600 |
| **CEC Effective** | Treatment x Time | 14 | 0.659 | 0.047 | 0.273 | 0.9950 |
|  |  | **Df** | **SS** | **MS** | **F-value** | **P-value** |
| **CEC Potential** | Treatment | 7 | 2.074 | 0.296 | 1.192 | 0.3250 |
| **CEC Potential** | Time | 2 | 7.646 | 3.823 | 15.376 | **0.0000** |
| **CEC Potential** | Treatment x Time | 14 | 3.804 | 0.272 | 1.093 | 0.3880 |
|  |  | **Df** | **SS** | **MS** | **F-value** | **P-value** |
| **Curve 0.1** | Treatment | 7 | 6.54 | 0.935 | 0.377 | 0.9090 |
| **Curve 0.1** | Time | 1 | 10.86 | 10.859 | 4.377 | **0.0444** |
| **Curve 0.1** | Treatment x Time | 7 | 7.2 | 1.028 | 0.415 | 0.8861 |
|  |  | **Df** | **SS** | **MS** | **F-value** | **P-value** |
| **Curve 15** | Treatment | 7 | 1.807 | 0.2582 | 0.277 | 0.9590 |
| **Curve 15** | Time | 1 | 0.859 | 0.8587 | 0.92 | 0.3450 |
| **Curve 15** | Treatment x Time | 7 | 1.202 | 0.1717 | 0.184 | 0.9870 |

**Table S6**. Soil chemical properties before addition of different amendments (day 0) (composite sample from the entire experimental area)

| Depth | pH | C | N | Al | Ca | Mg | K | P |
| --- | --- | --- | --- | --- | --- | --- | --- | --- |
| cm | - | % | | cmol.dm-1 | | | mg.L-1 | |
| 0-20 | 5.47 | 0.79 | 0.07 | 0.12 | 1.64 | 0.69 | 96.00 | 12.32 |

**Table S7.** Summary of results from post-hoc HSD-Tukey test, considering only the statistically significant effects of time (*P*<0.05) observed in ANOVA analysis. Time1 is day 0, Time2 day 120 and Time3 day 180. The different letters in the Group column represents significant differences between the time. Where: N (Nitrogen), P (Phosphorus), Mg (Magnesium), pH (soil acidity), C/N (Carbon/ nitrogen ratio), CEC Potential (Potential Cation exchange capacity), Curve 0.1 (Retention Soil Moisture curve).

| **pH** | **Means** | **Group** |
| --- | --- | --- |
| Time1 | 5.60 | a |
| Time2 | 5.48 | ab |
| Time3 | 5.28 | b |
| **N** | **Means** | **Group** |
| Time2 | 1.24 | a |
| Time1 | 1.15 | a |
| Time3 | 1.01 | b |
| **P** | **Means** | **Group** |
| Time2 | 39.48 | a |
| Time3 | 34.23 | ab |
| Time1 | 29.60 | b |
| **Mg** | **Means** | **Group** |
| Time1 | 0.49 | a |
| Time3 | 0.44 | ab |
| Time2 | 0.41 | b |
| **C/N** | **Means** | **Group** |
| Time3 | 6.09 | a |
| Time2 | 5.11 | b |
| Time1 | 3.47 | c |
| **Organic matter** | **Means** | **Group** |
| Time2 | 1.08 | a |
| Time3 | 1.05 | a |
| Time1 | 0.67 | b |
| **Moisture** | **Means** | **Group** |
| Time1 | 8.00 | a |
| Time3 | 4.03 | b |
| Time2 | 2.12 | c |
| **CEC Potential** | **Means** | **Group** |
| Time2 | 4.40 | a |
| Time3 | 3.98 | b |
| Time1 | 3.60 | c |
| **Curve 0.1** | **Means** | **Group** |
| Time3 | 8.86 | a |
| Time2 | 7.90 | b |

**Table S8.** Summary of results from post-hoc HSD-Tukey test, considering only the statistically significant effects of treatment (*P*<0.05) observed in the ANOVA analysis. The different letters in the Group column represents significant differences between the treatments. Treatments are represented by: B (Biochar), BIF (Biochar + Inoculant + Fertilizer), BI (Biochar + Inoculant), BF (Biochar + Fertilizer), I (Inoculant), IF (Inoculant + Fertilizer), F (Fertilizer), and Control.

| **K** | **Means** | **Group** |
| --- | --- | --- |
| B | 106.89 | A |
| BIF | 103.11 | A |
| BI | 101.56 | A |
| BF | 99.33 | A |
| I | 72.67 | B |
| IF | 72.44 | B |
| F | 62.44 | B |
| Control | 57.56 | B |
| **Mg** | **Means** | **Group** |
| BIF | 0.57 | a |
| BF | 0.53 | ab |
| IF | 0.46 | abc |
| BI | 0.42 | abc |
| F | 0.42 | abc |
| B | 0.41 | bc |
| I | 0.41 | bc |
| Control | 0.36 | c |
| **pH** | **Means** | **Group** |
| BIF | 5.85 | a |
| BF | 5.78 | ab |
| B | 5.67 | ab |
| BI | 5.58 | abc |
| IF | 5.33 | abc |
| I | 5.26 | bc |
| F | 5.08 | c |
| Control | 5.04 | c |
| **CEC Effective Means** | | **Group** |
| BIF | 2.63 | a |
| BF | 2.46 | ab |
| BI | 2.24 | ab |
| IF | 2.20 | ab |
| B | 2.15 | ab |
| I | 2.11 | ab |
| F | 1.99 | b |
| Control | 1.92 | b |

Figure S3: the temporal change in N (g/kg) following amendment (day 0), maize harvest (day 120) and bean harvest (day 180).


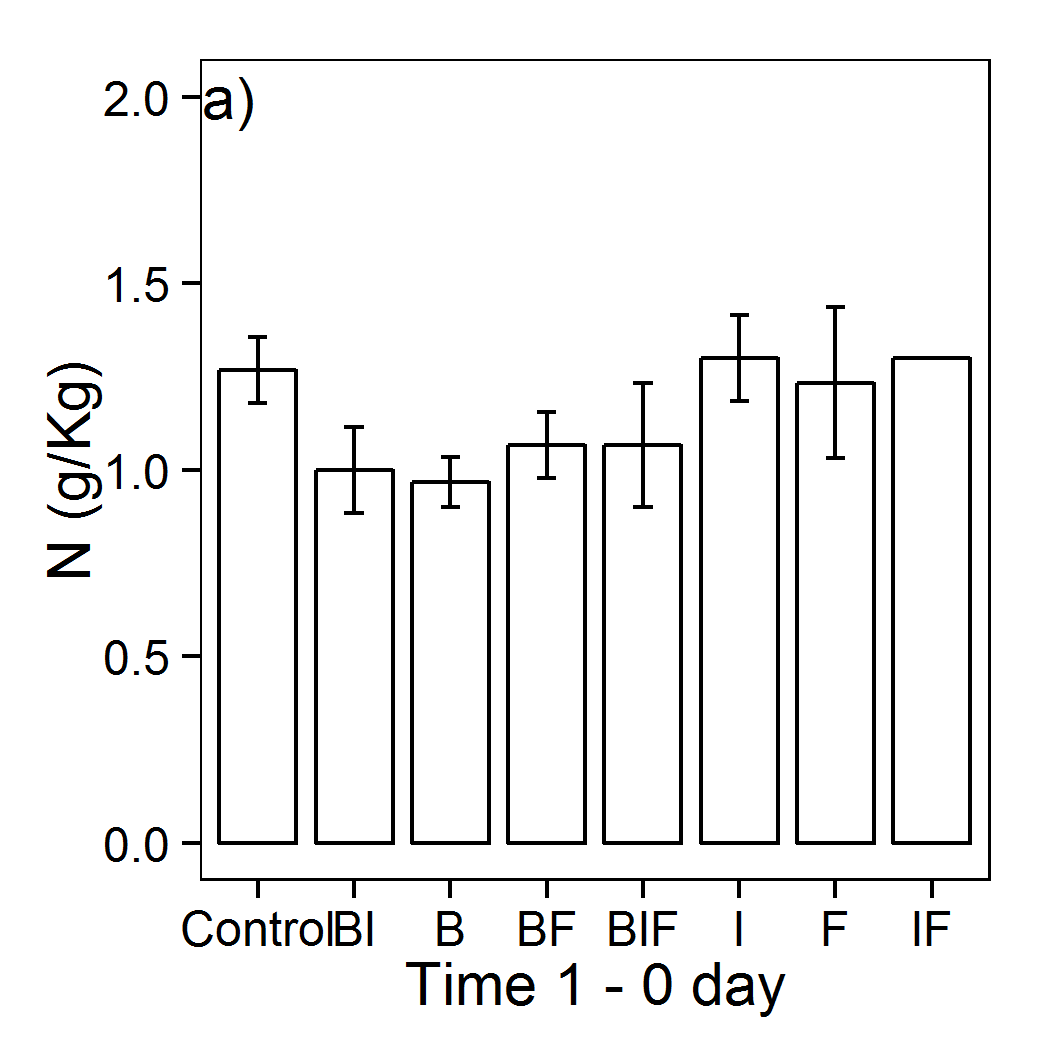

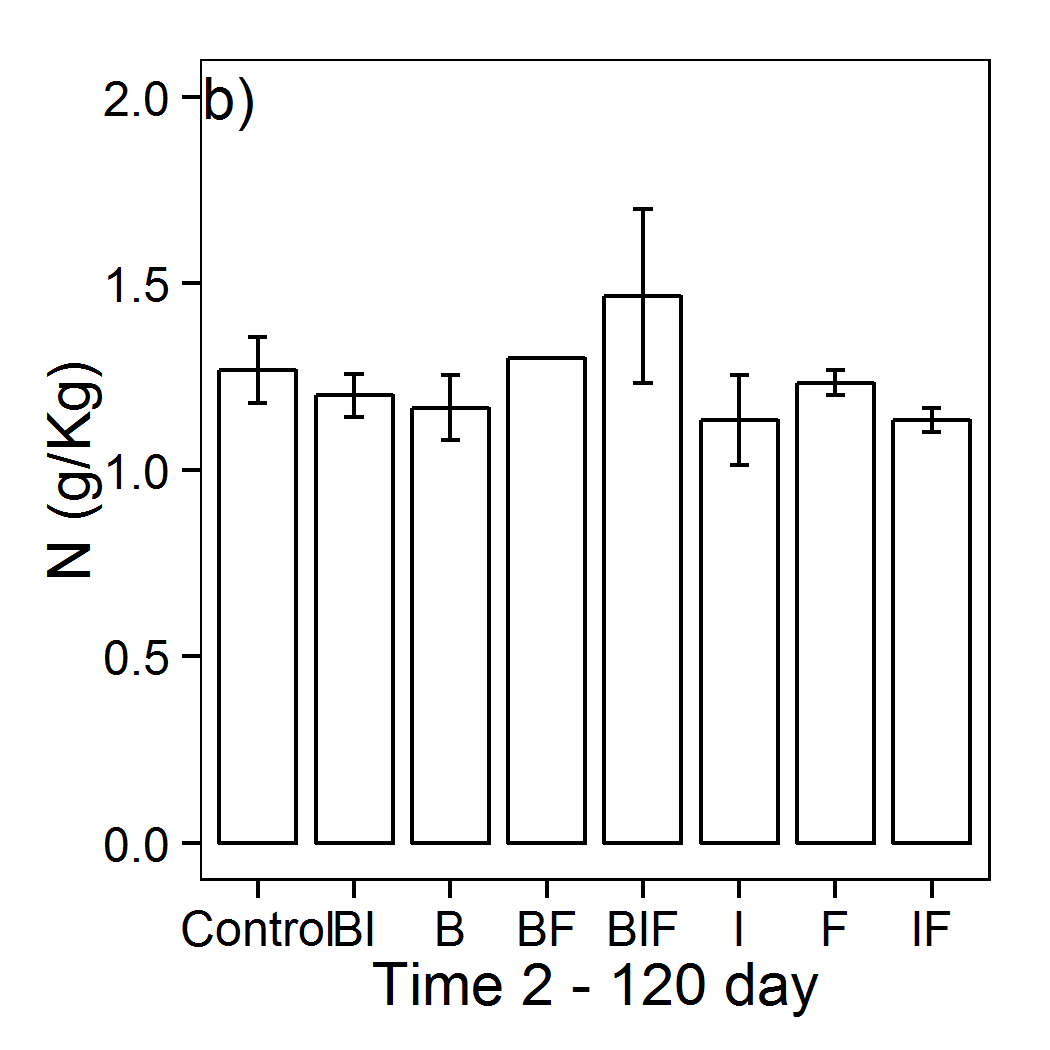

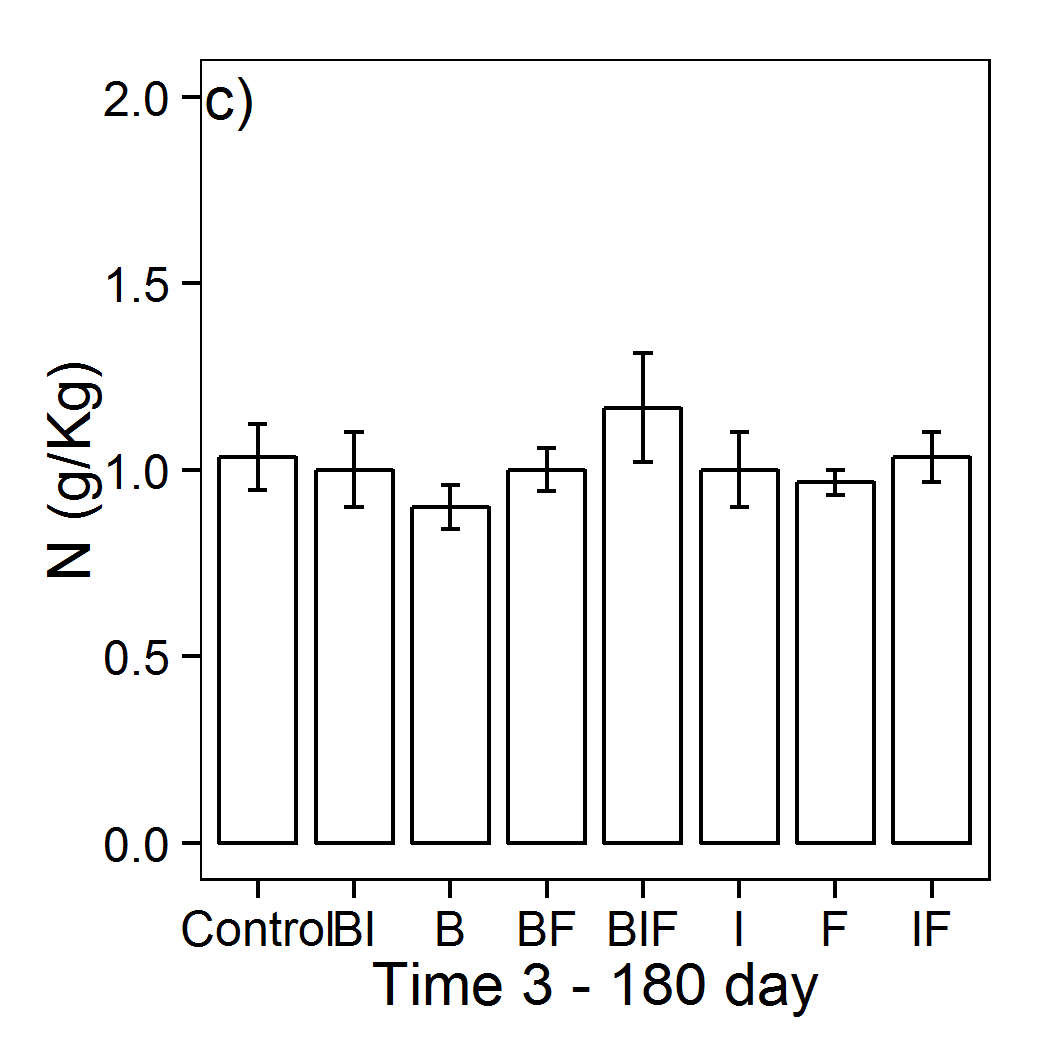


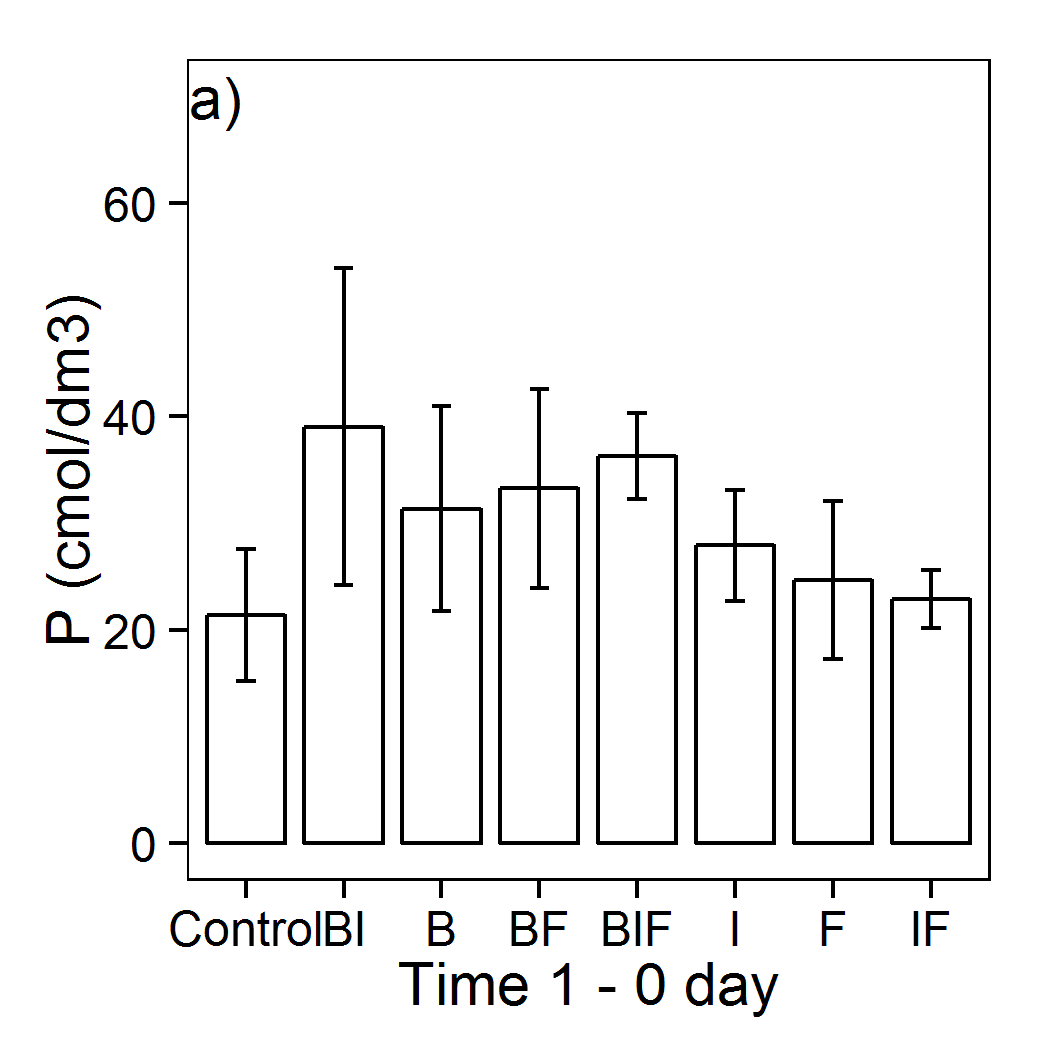

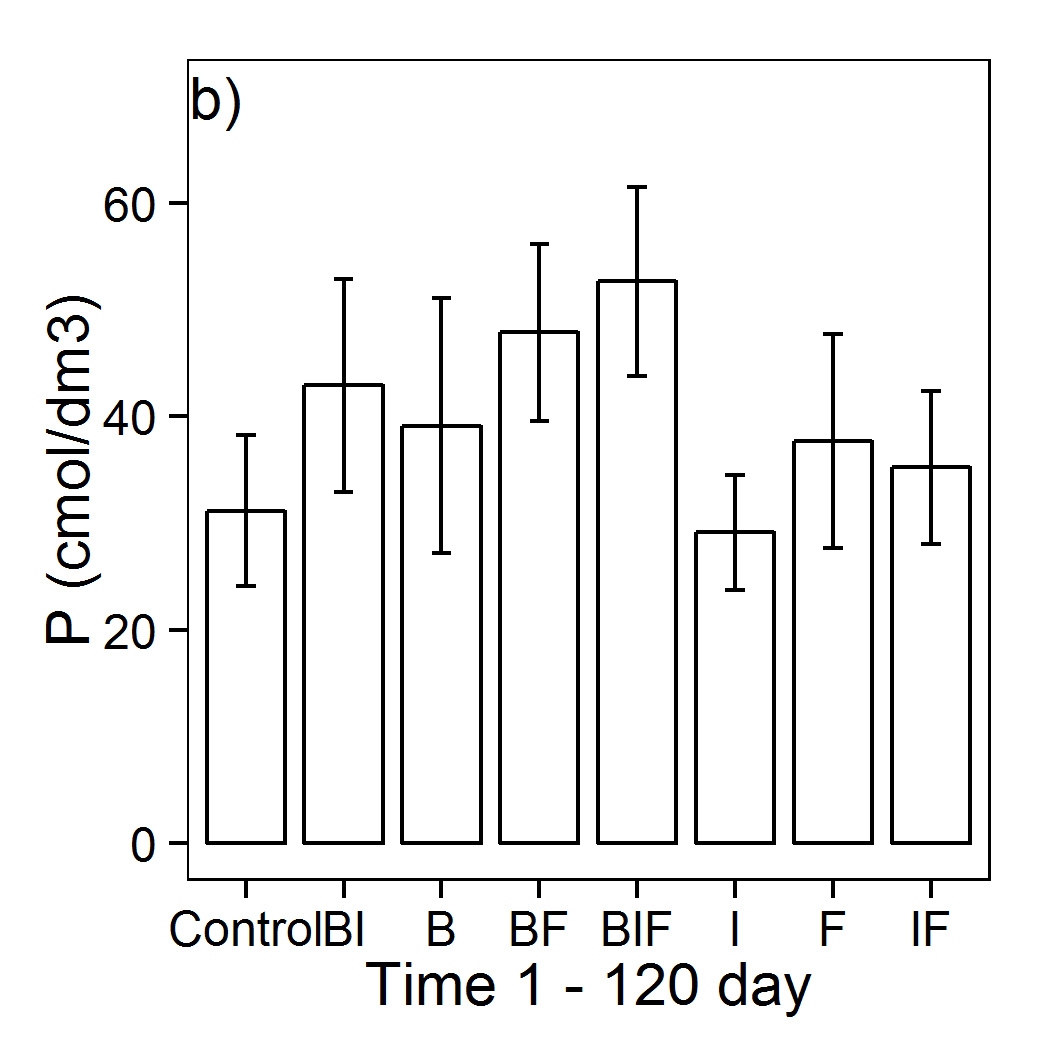

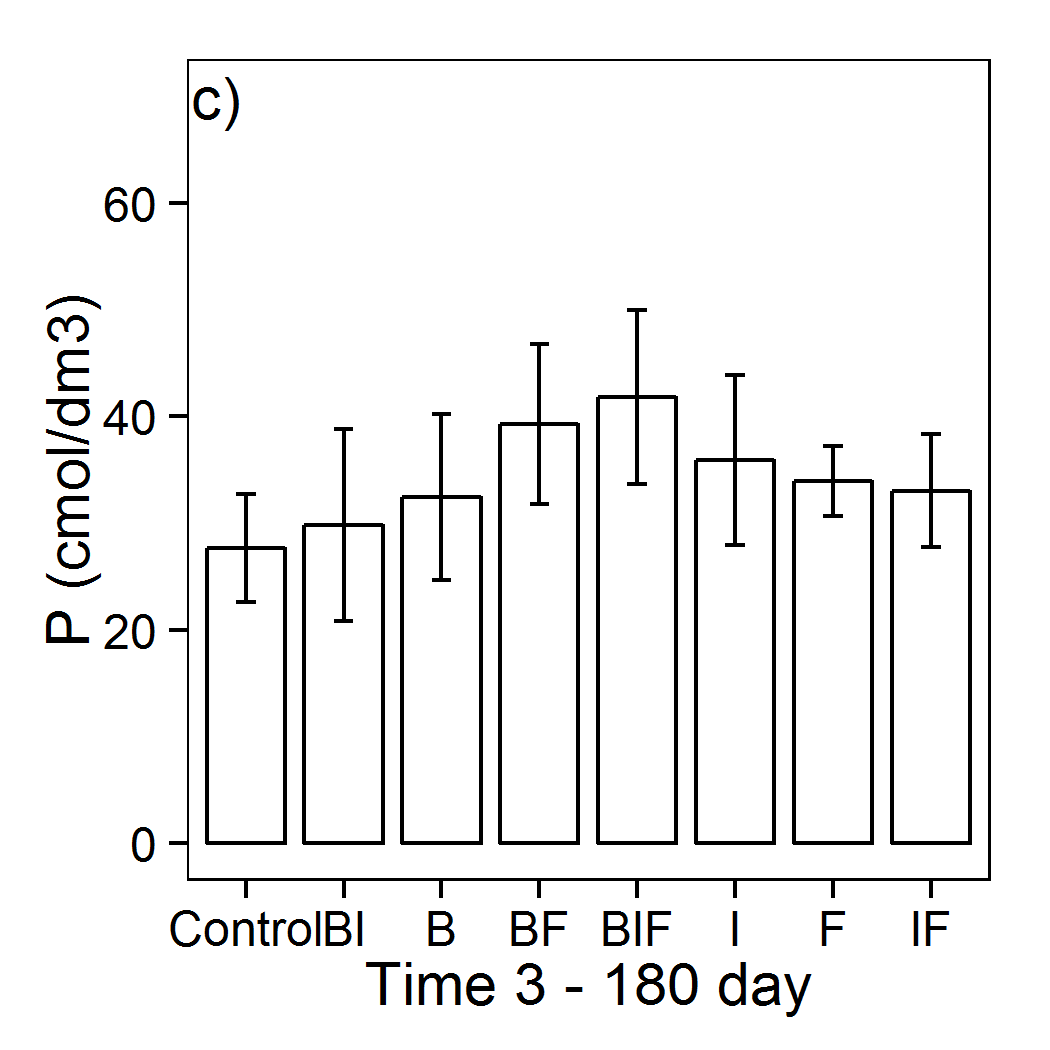


Figure S4: the temporal change in P (cmol/dm3) following amendment (day 0), maize harvest (day 120) and bean harvest (day 180).


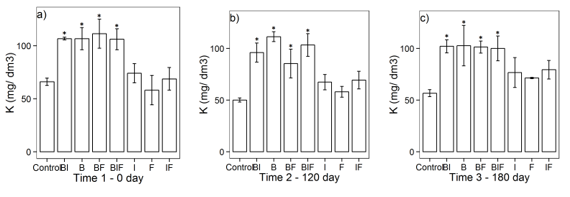


Figure S5: the temporal change in K (mg/dm3) following amendment (day 0), maize harvest (day 120) and bean harvest (day 180). Symbols * indicate statistically significant difference of treatment C in relation to all treatments that contain biochar.


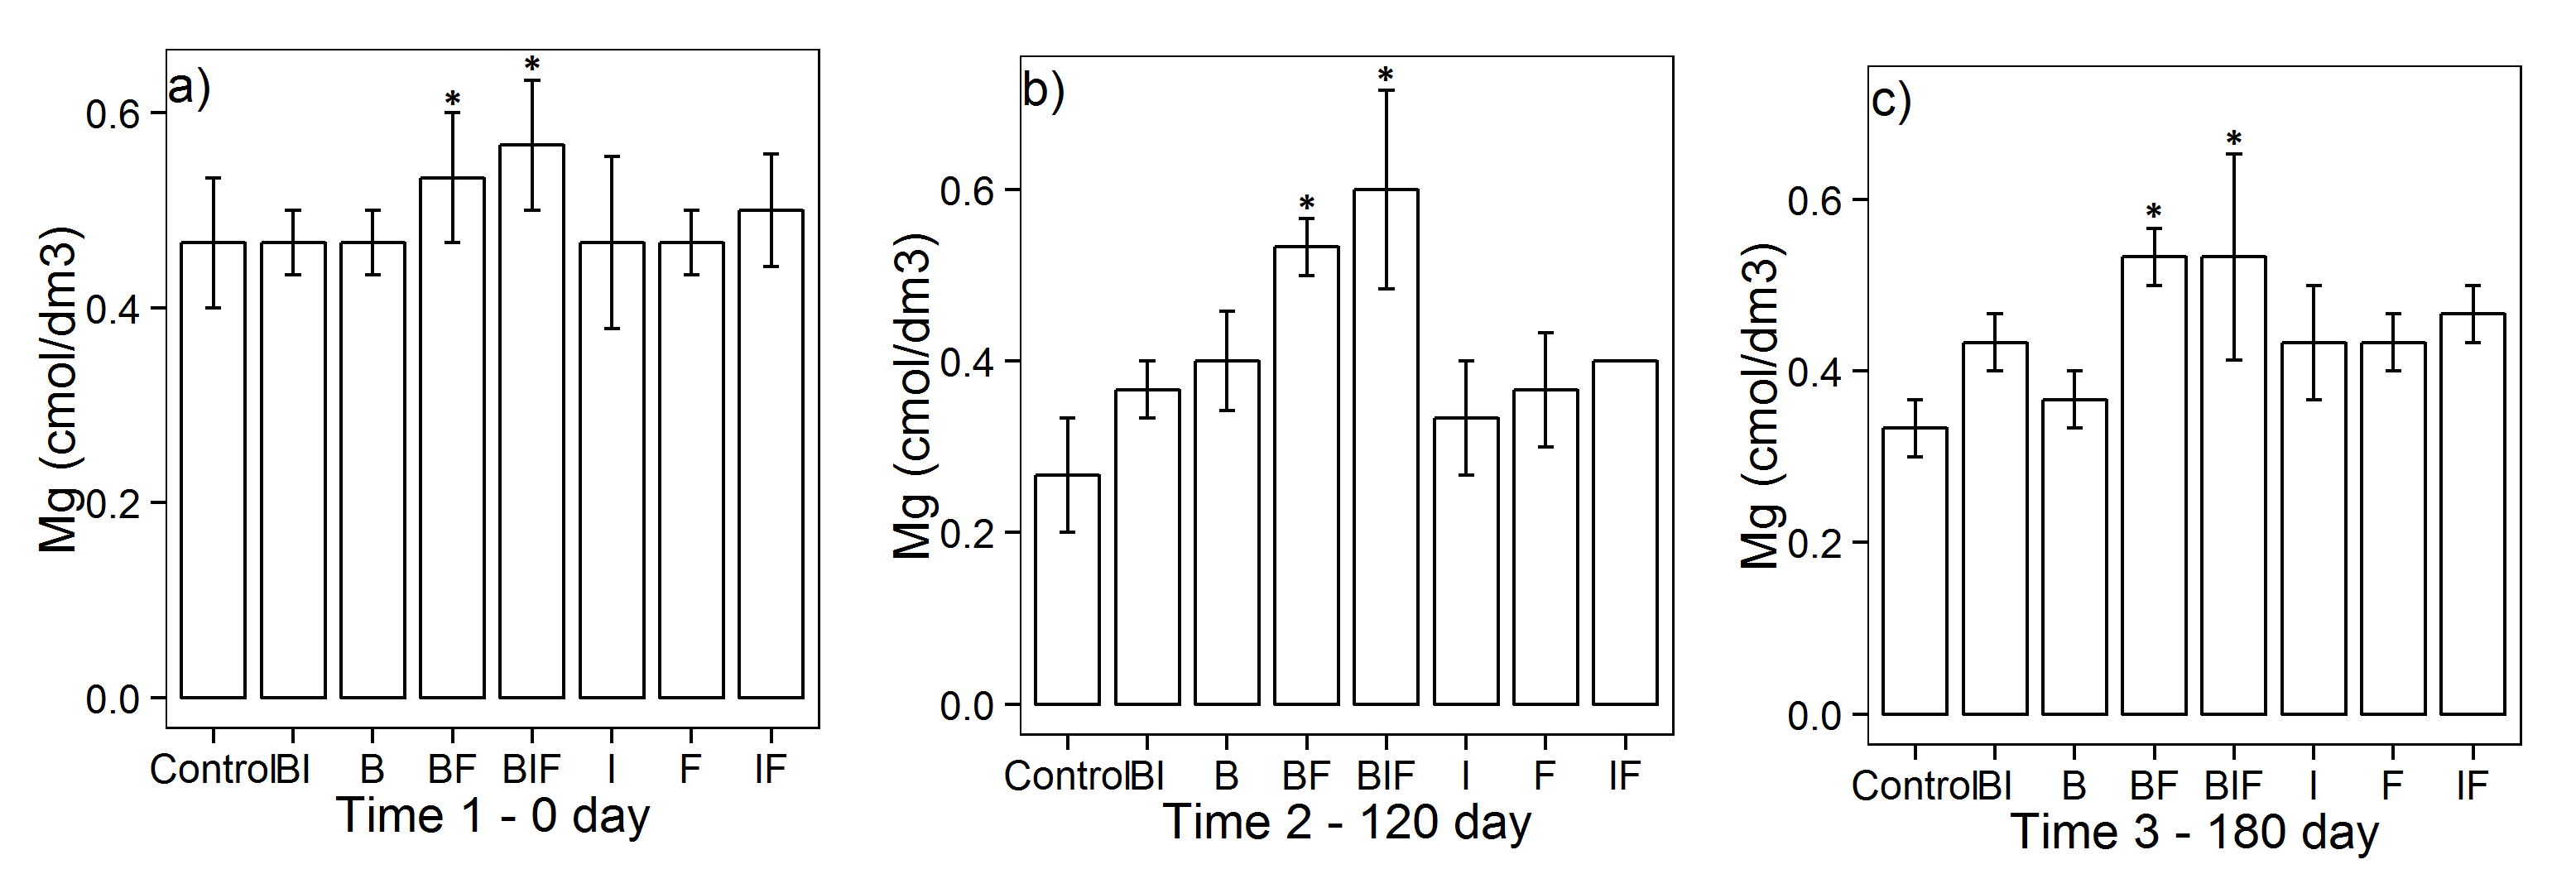


Figure S6: the temporal change in Mg (cmol/dm3) following amendment (day 0), maize harvest (day 120) and bean harvest (day 180). Symbol * indicates statistically significant difference of treatment C in relation to treatments BF and BIF.


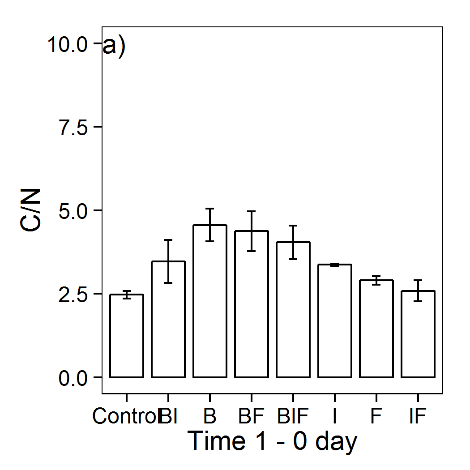

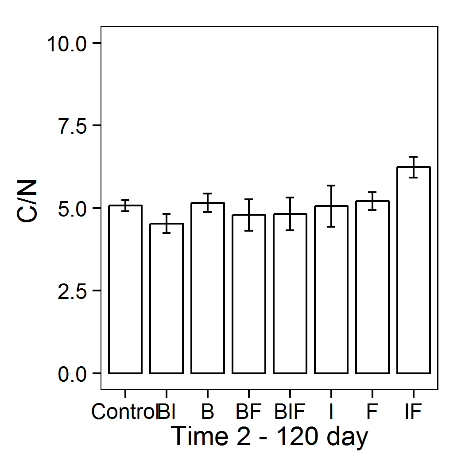

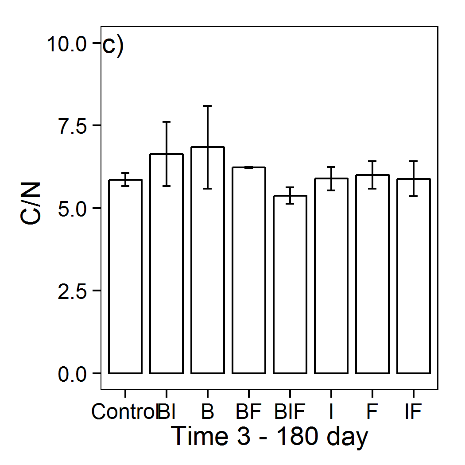


Figure S7: the temporal change in C/N following amendment (day 0), maize harvest (day 120) and bean harvest (day 180).


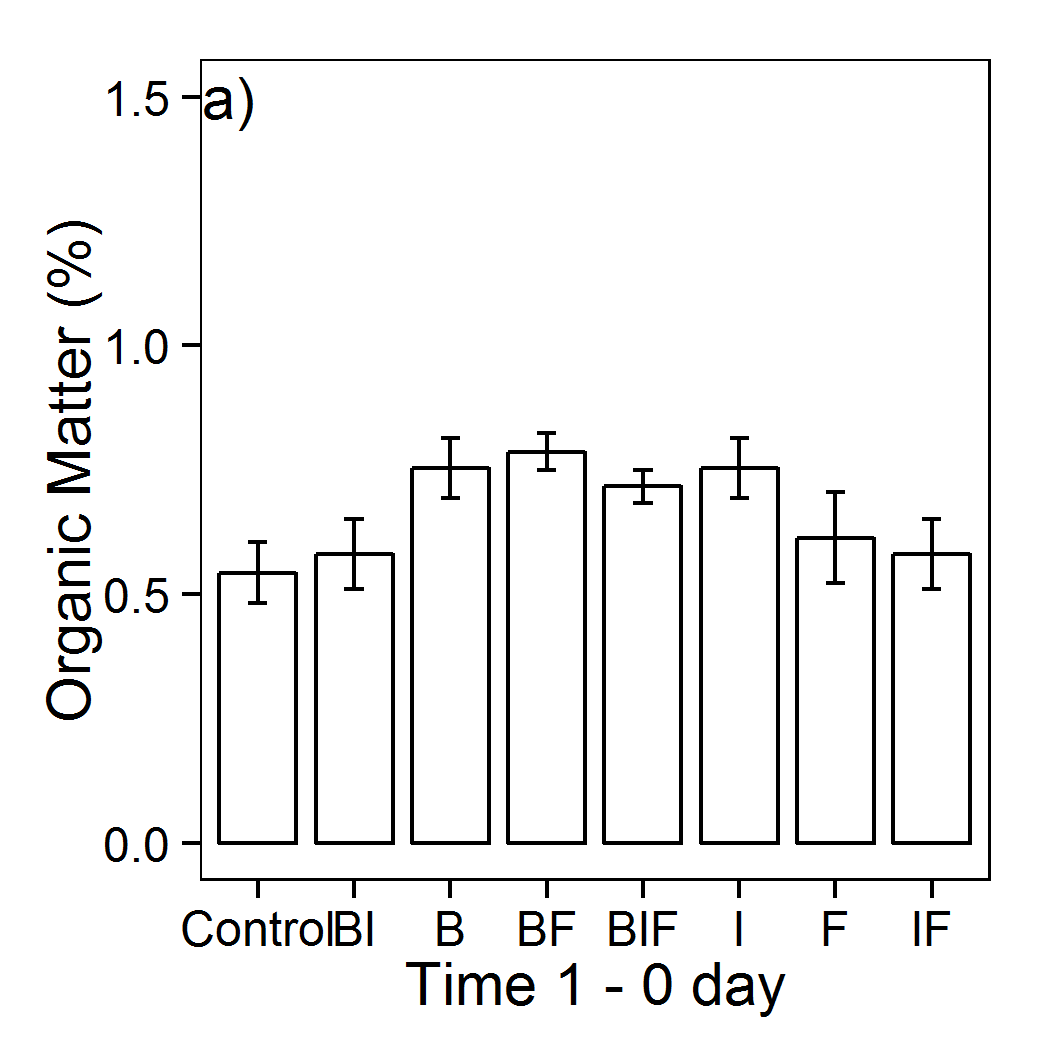

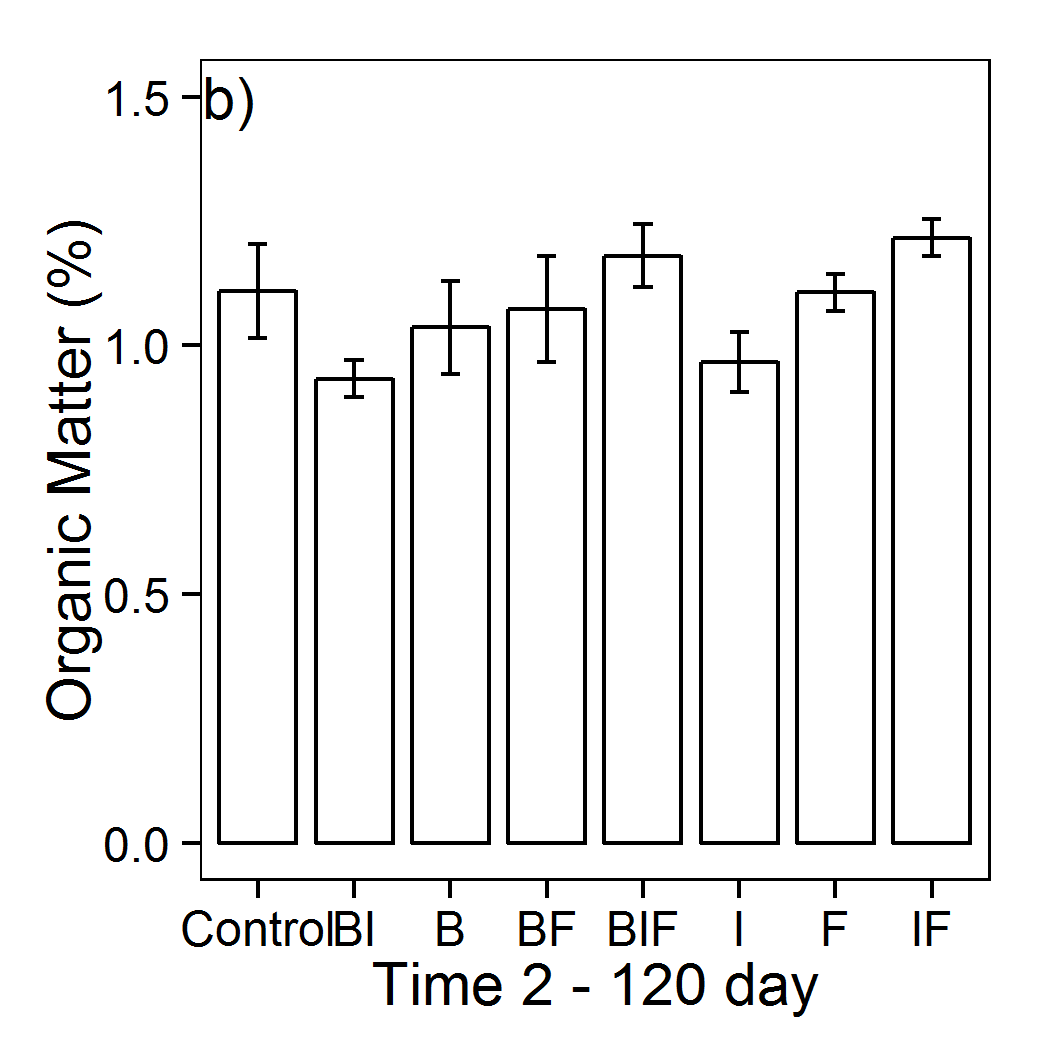

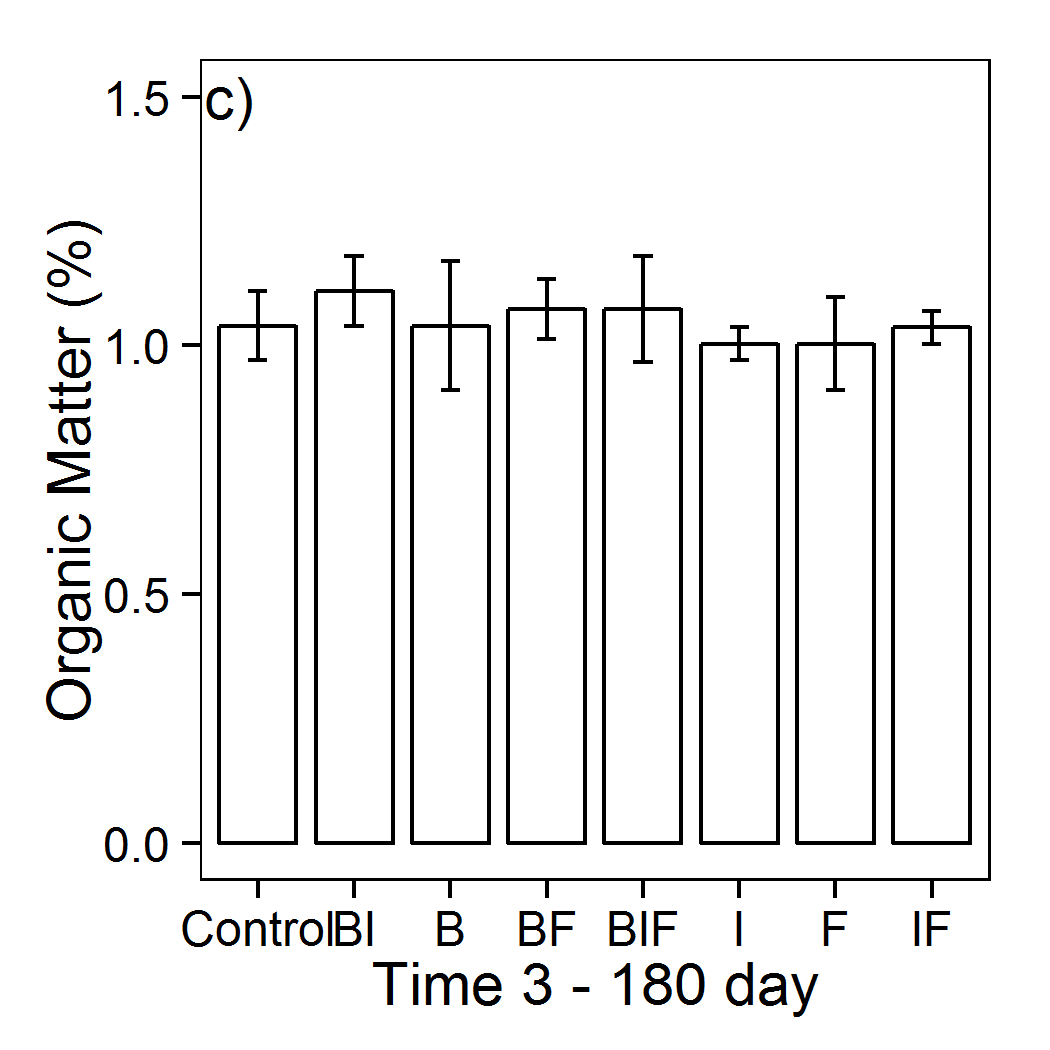


Figure S8: the temporal change in organic matter (%) following amendment (day 0), maize harvest (day 120) and bean harvest (day 180).


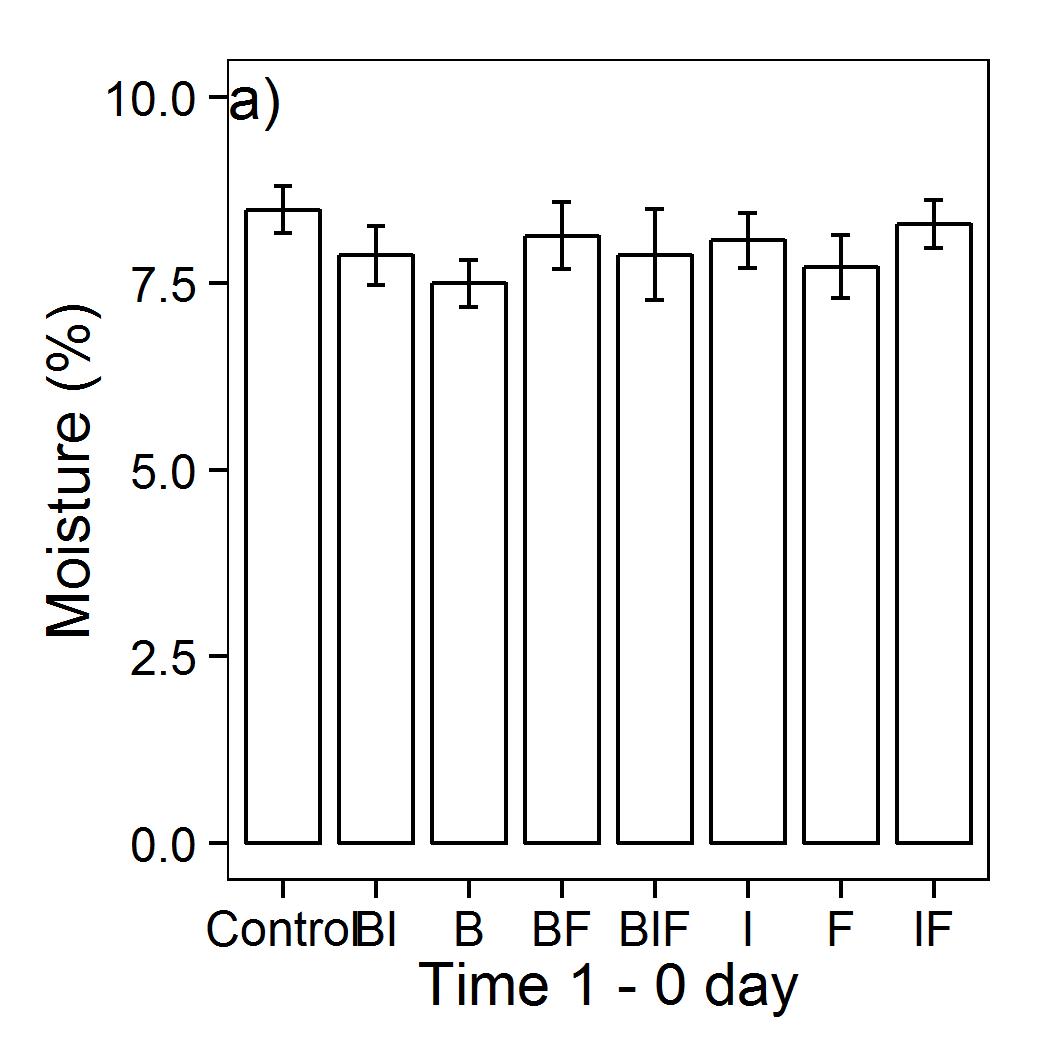

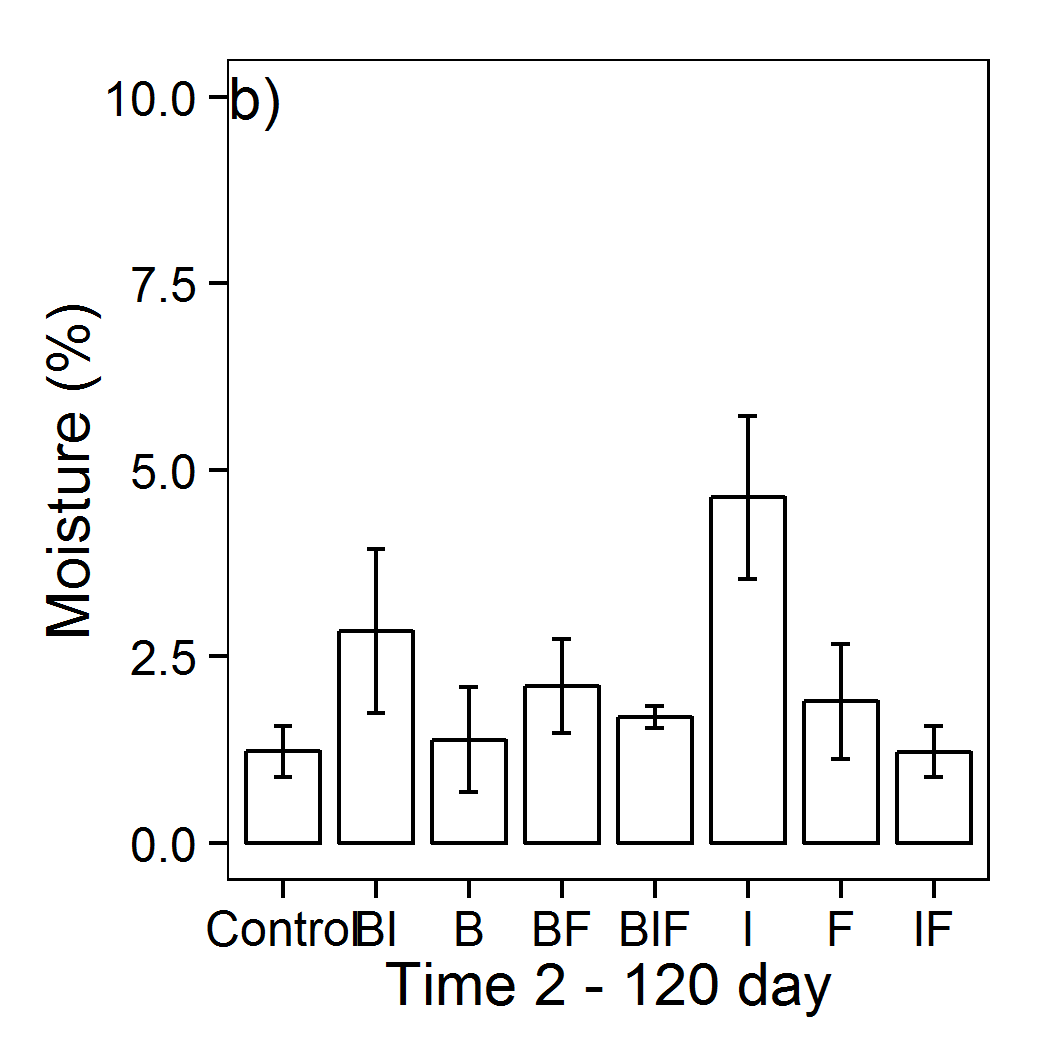

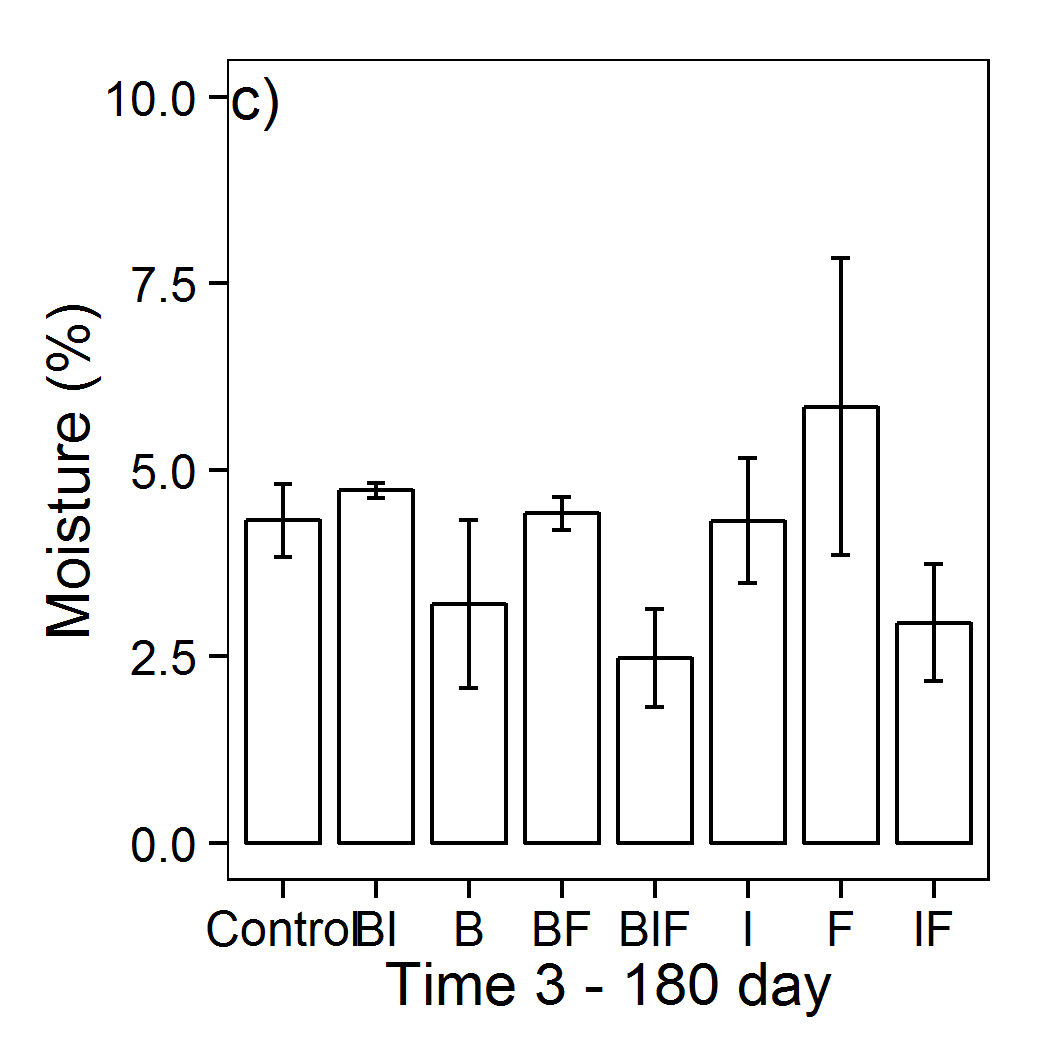


Figure S9: the temporal change in moisture (%) following amendment (day 0), maize harvest (day 120) and bean harvest (day 180).


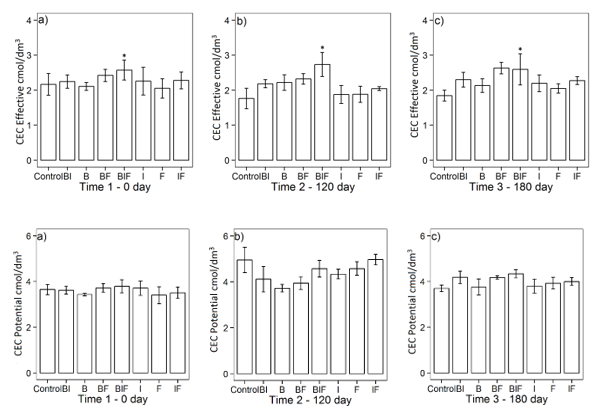


Figure S10: the temporal change in cation exchange capacity (CEC) effective and potential (cmol/dm3) following amendment (day 0), maize harvest (day 120) and bean harvest (day 180). Symbol * indicates statistically significant difference between treatment C and BIF


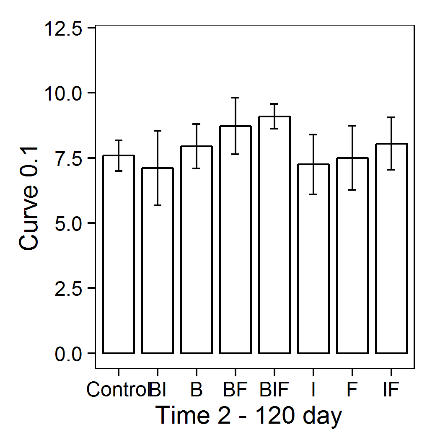

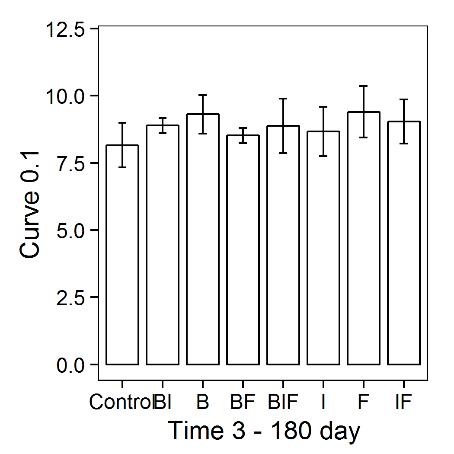


Figure S11: the temporal change in pF following amendment maize harvest (day 120), and bean harvest (day 180).

Figure S12: Photographs from the field trial


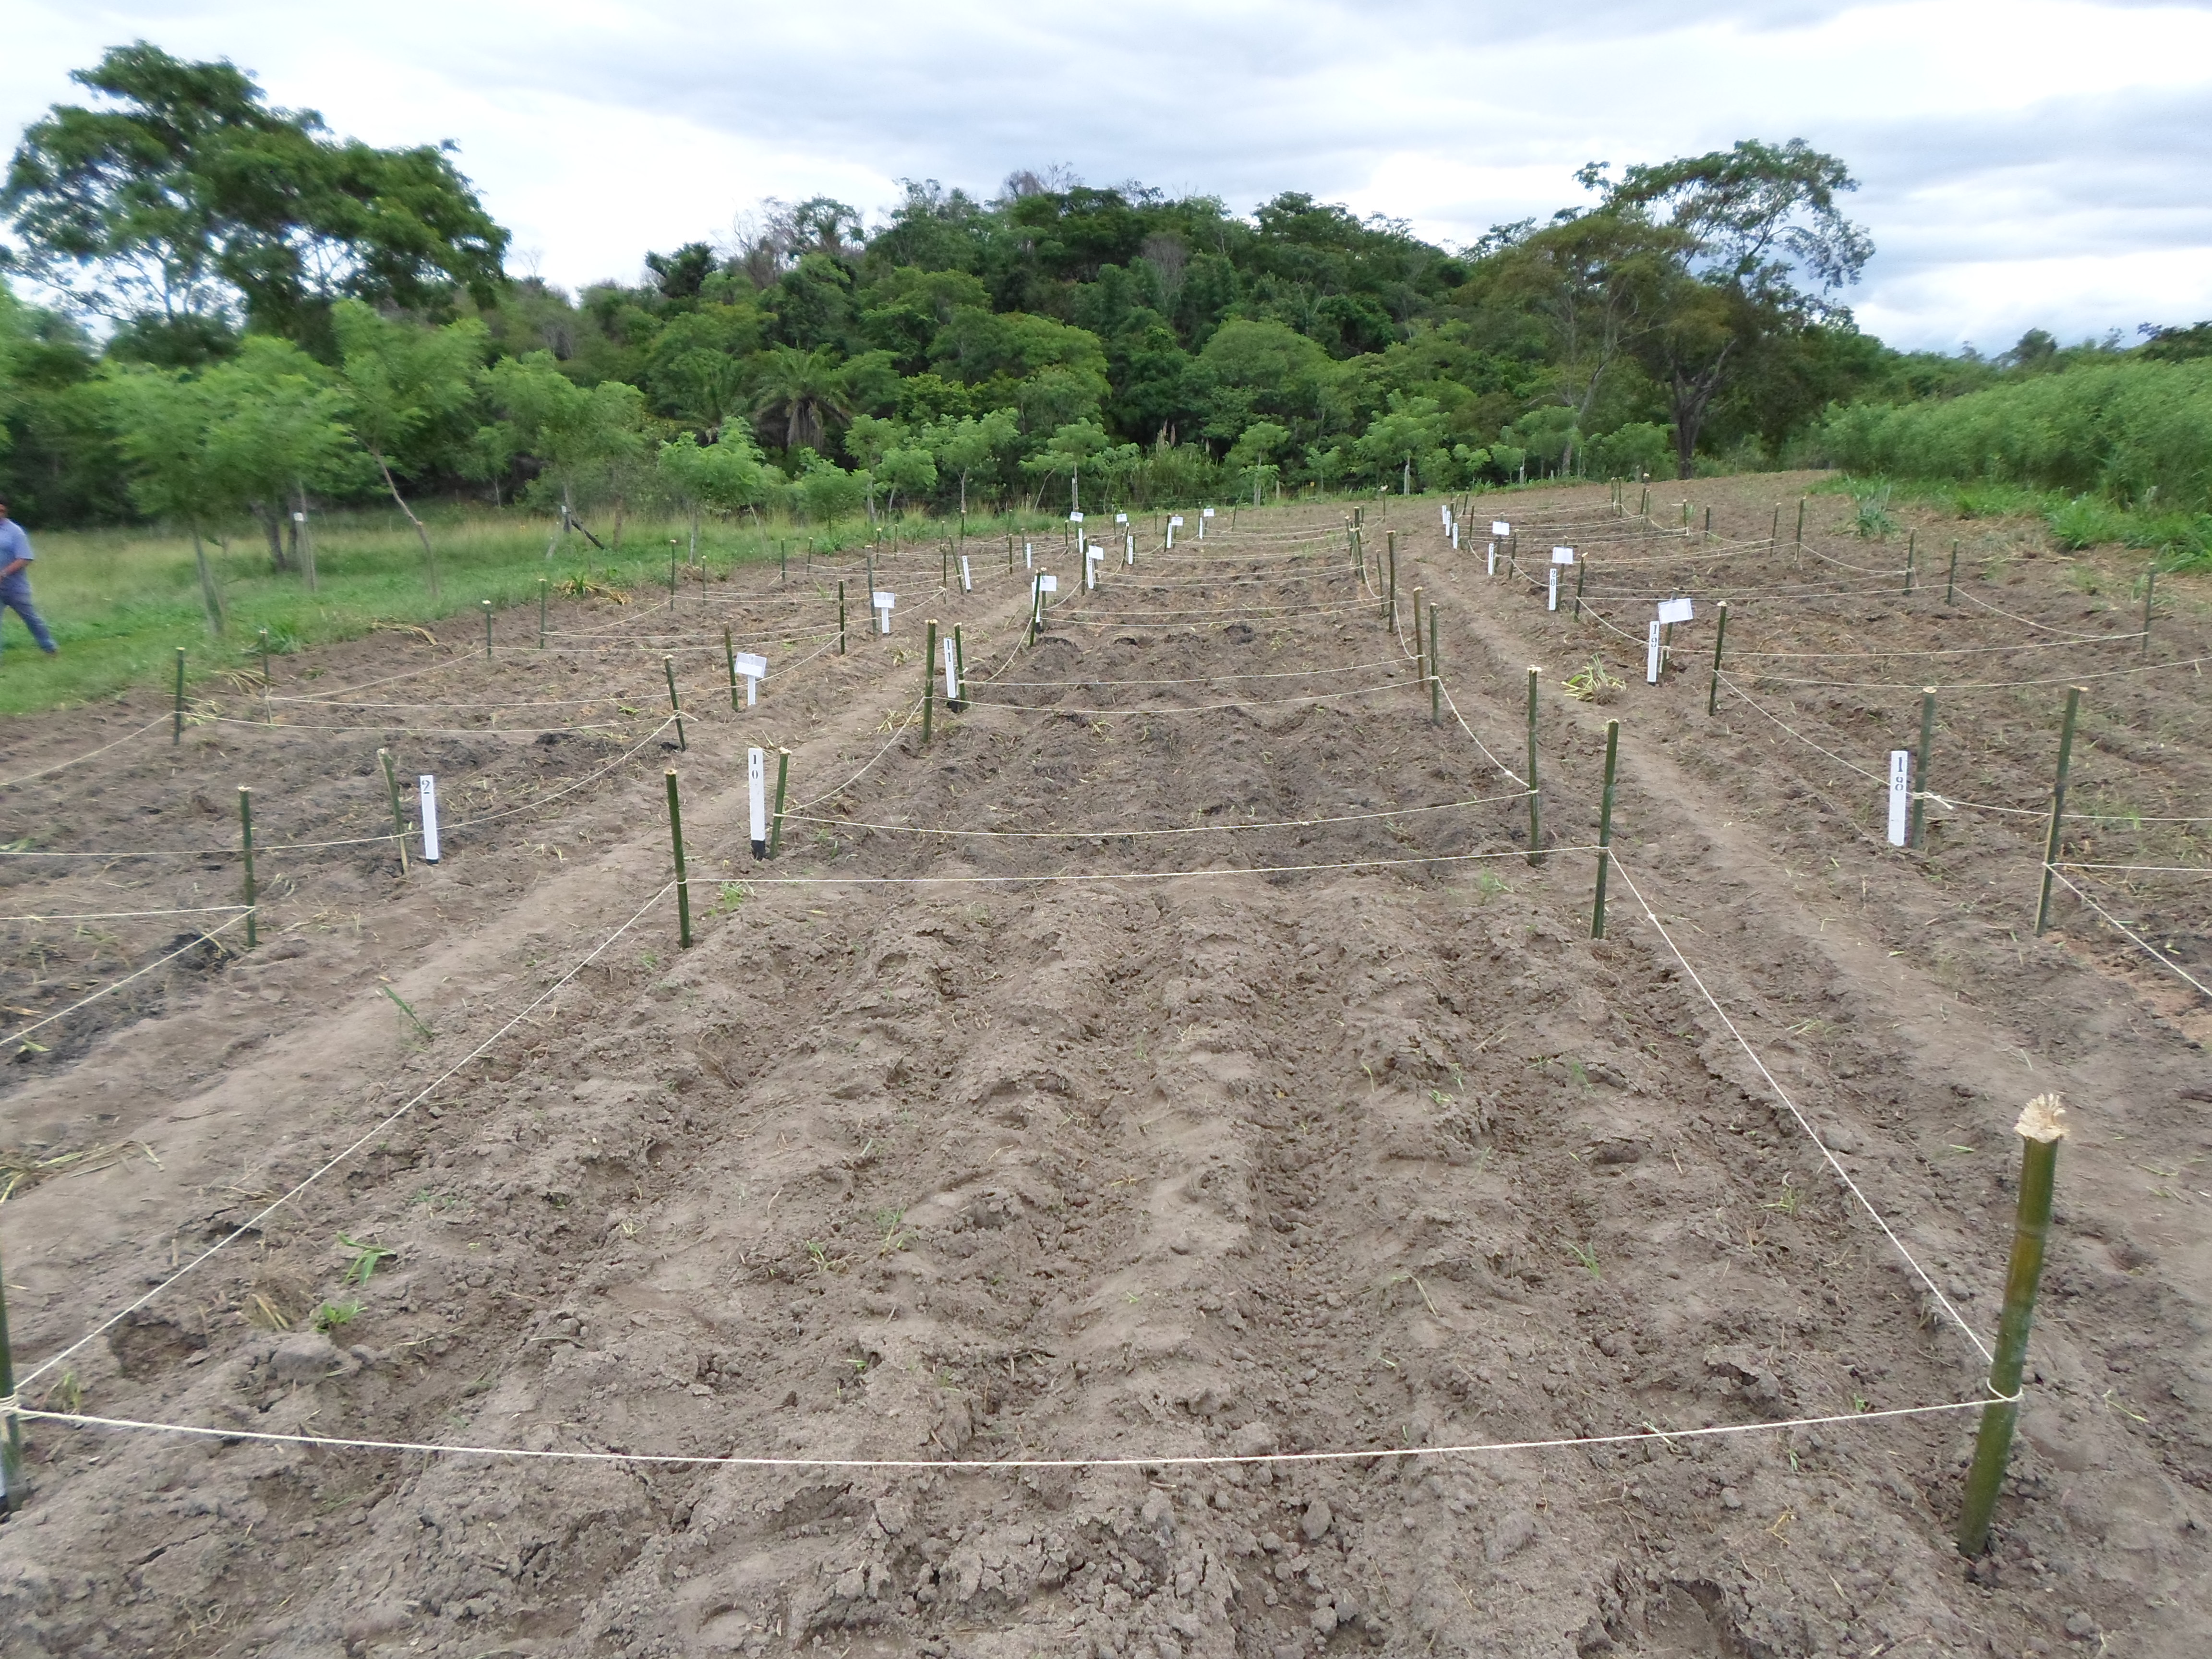


Experimental area overview


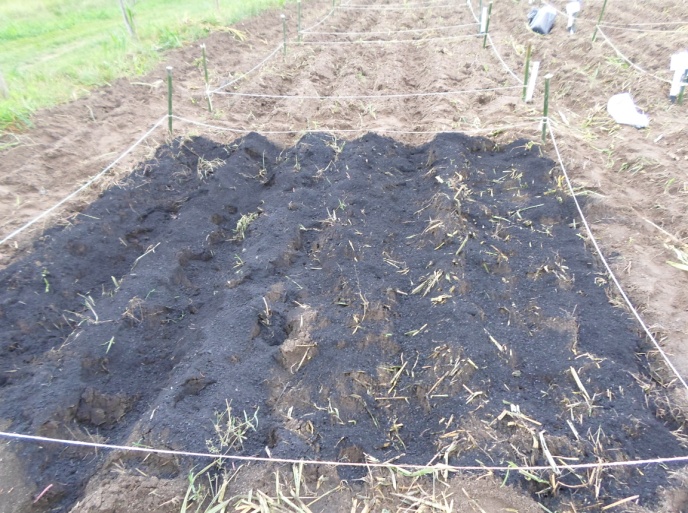

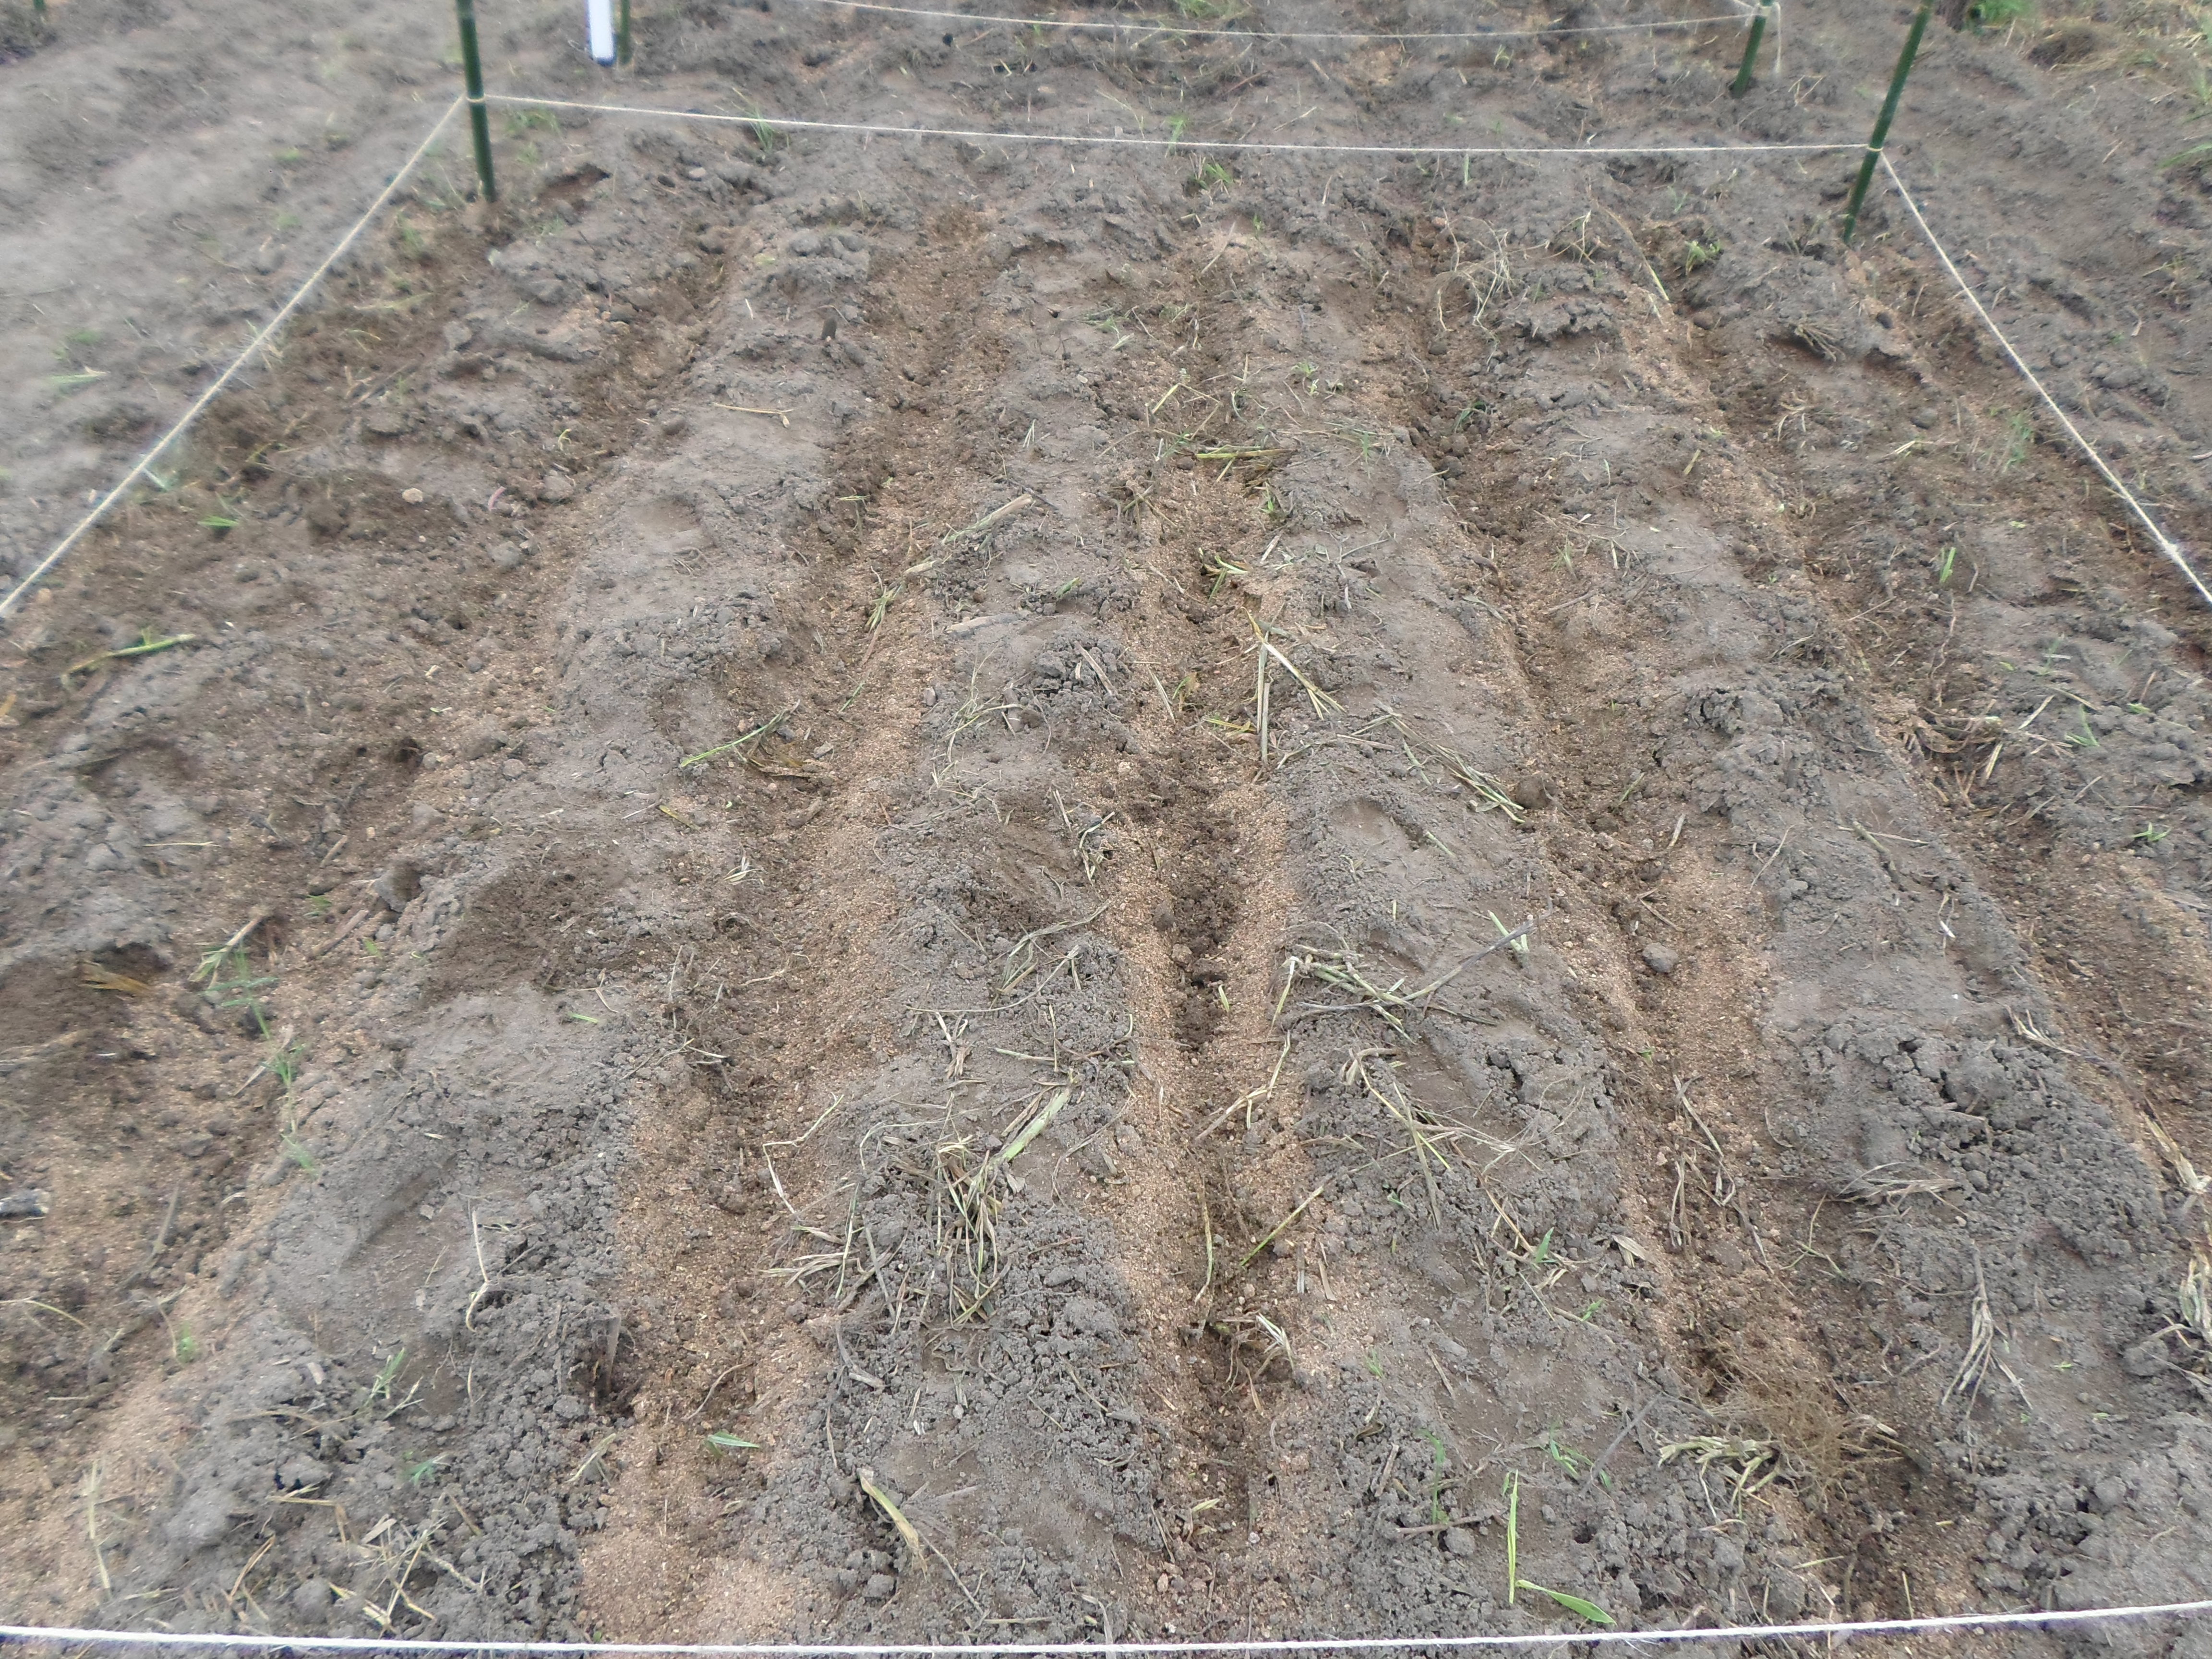


Biochar applied via broadcast Groove Fertilization Bokashi compost.


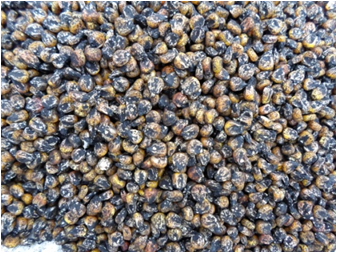

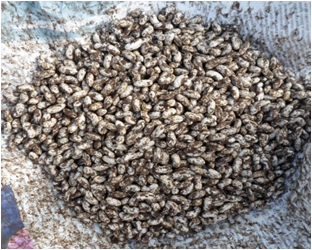


Maize seeds inoculated with Bean seeds co-inoculated *Azospirillum brasilense. Rhizobium tropici* + *Azospirillum brasilense* .


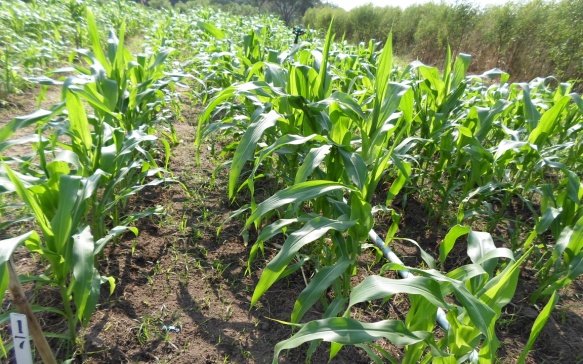

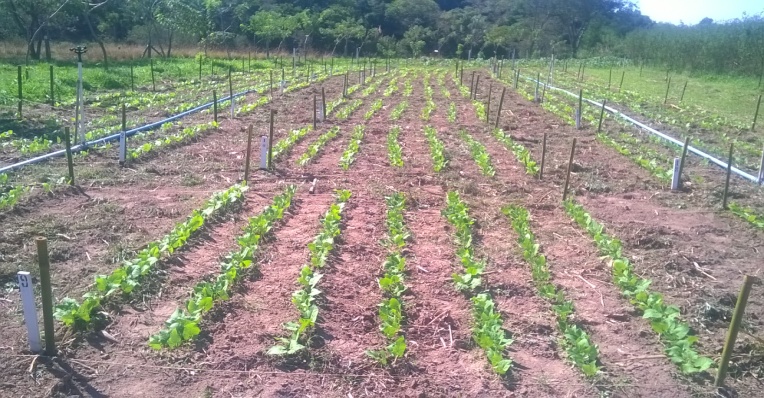


Maize var. caatingueiro planting. Bean cv. Alessa planting.


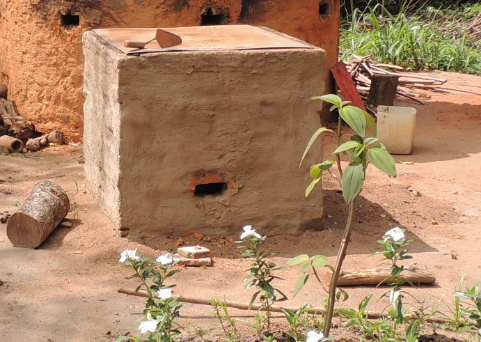

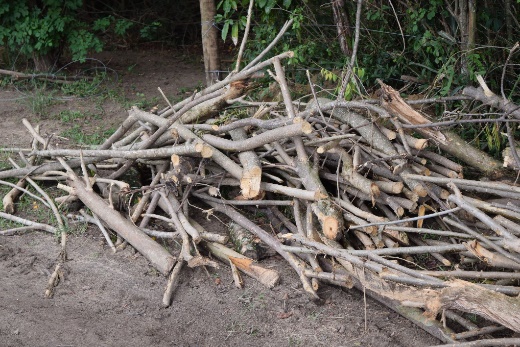


Oven used for biochar production *Gliricidia* prepared for pyrolysis.
